# Supplementary material for: Plasmon induced ultrafast injection of hot electrons in Au nanoislands grown on a CdS film
Source: Royal Society of Chemistry journal article supplement (doi:10.1039/c6tc04243k), 2016-12-13
Supplement: c6tc04243k1.pdf [file c6tc04243k1.pdf]

## Supplementary Material

### Plasmon induced ultrafast injection of hot electrons in Au nanoislands grown on CdS film

Alka Sharma<sup>a,b</sup>, Chhavi Sharma<sup>a,b</sup>, Biplab Bhattacharyya<sup>a,b</sup>, Kaweri Gambhir<sup>a,b</sup>, Mahesh Kumar<sup>a,b</sup>, Suresh chand<sup>a,b</sup>, Ranjana Mehrotra<sup>a,b</sup> and Sudhir Husale<sup>a,b\*</sup>

---

<sup>a.</sup> *Academy of Scientific and Innovative Research (AcSIR), National Physical Laboratory, Council of Scientific and Industrial Research, Dr. K. S Krishnan Road, New Delhi-110012, India.*

<sup>b.</sup> *National Physical Laboratory, Council of Scientific and Industrial Research, Dr. K. S Krishnan Road, New Delhi-110012, India.*

\*e-mail: husalesc@nplindia.org

#### Contents:

1. Description of ultrafast time resolved pump–probe system.
2. Energy dispersive spectroscopy (EDS) spectra of Au-CdS film.
3. Three dimensional schematic diagram of Au-CdS film.
4. Bias voltage dependent photocurrent measurement and stability of device under 400nm illumination and white light respectively.
5. Power dependent photocurrent measurement and bias voltage dependent rise time measurement under NIR 1064nm illumination (power density,  $P_d= 29\text{mW}/\text{cm}^2$ ).
6. Step wise rise of current & photocurrent dependence on power density.
7. Description of topographic (2D) NSOM imaging.
8. FDTD simulation results of Au-CdS film.
9. Simulated absorption spectra of Au-CdS and experimental result of transmission spectra of Au-CdS.
10. Expanded spectra of CdS and Au-CdS pumped at 480nm.
11. Transient absorption spectra of only gold nanoislands at 1250nm pumping.
12. Comparison between CdS and Au-CdS in transient absorption and transient kinetic spectrum.
13. Table 1: Transient kinetic analysis of CdS film pumped at 1250nm, 2: Transient kinetic analysis of Au-CdS pumped at 1250nm, 3: Comparison between recovery dynamics of CdS and Au-CdS pumped at 1250nm, 4: Reported mechanism for metal and semiconductor, 5: Detail kinetic study at different pumping wavelength.

## 1. Description of ultrafast (femto-pico second) time resolved absorption Visible/NIR pump-probe spectroscopic system (UTRPPS).

To investigate the charge carrier excitation and relaxation dynamics of the device, UFTRPPS is best non contact technique. The ultrafast time resolved absorption spectroscopy is pump–probe method in which sample is excited /pumped at a given wavelength (UV/Vis/NIR) for different delay time period. In our experiment, UFTRPPS measurement has been performed at room temperature using experimental setup consists of an oscillator (micra), regenerative amplifier (coherent legend) coupled with an operational parametric amplifier (OPA). Figure S1 shows a simplified block diagram of the ultrafast (femto-pico second) time resolved absorption visible/NIR pump-probe spectroscopic system. The oscillator is basically a verdi pumped micra system whose output (350mW power with 800nm pulses) is seeded to an amplified Ti: sapphire laser system which produces a pulse with 800nm, 45fs pulse width with 1 KHz repetition rate and 4mJ average energy output. The output of the laser system further divides into 2 portions: one is fed into OPA (TOPAS) to produce a desired wavelength to excite the sample. The OPA produces a spectrally tunable (240-2600 nm) femto second (fs) pulses with an output pulse duration of 80fs to excite/pump the sample while other is fed into spectrometer (HELIOS, Ultrafast system) passing through a delay stage of 0-8ns which further falls on sapphire crystal producing white light continuum as a probe pulse.

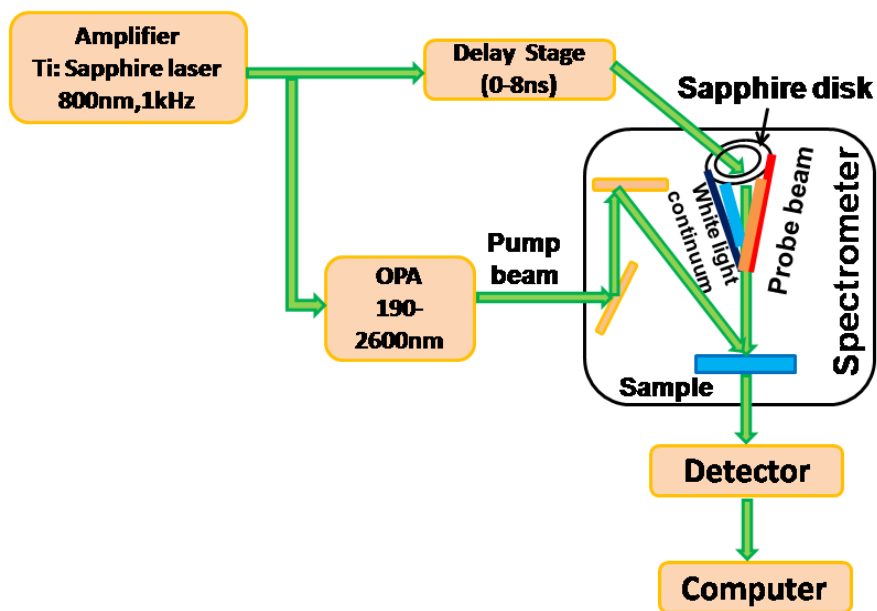

**Fig.S1** Block diagram of the Ultrafast (femto-pico second) time resolved absorption Visible/NIR pump-probe spectroscopic system (UTRPPS).

## 2. Energy dispersive spectroscopy (EDS) spectra of Au-CdS film.

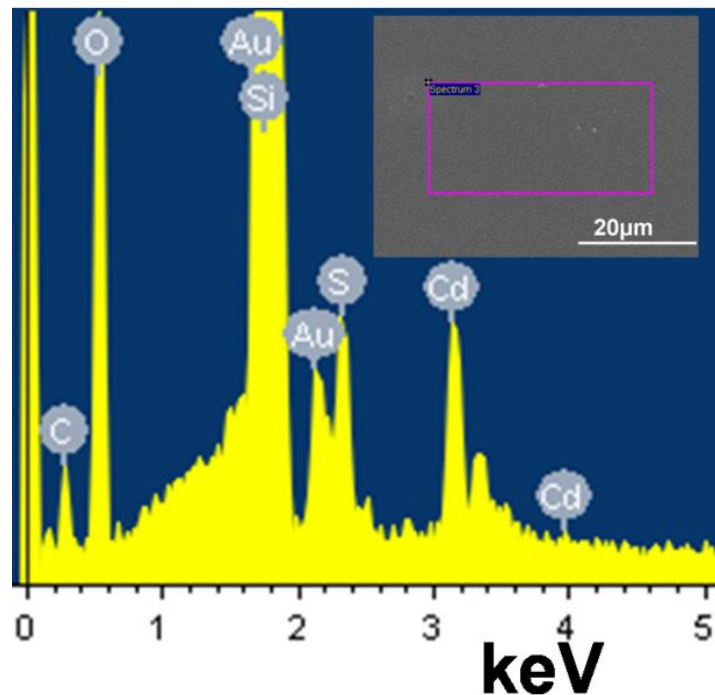

Fig. S2 EDS spectra of Au-CdS film. The characterized FESEM image is shown in inset.

## 3. Three dimensional schematic diagram of Au-CdS film

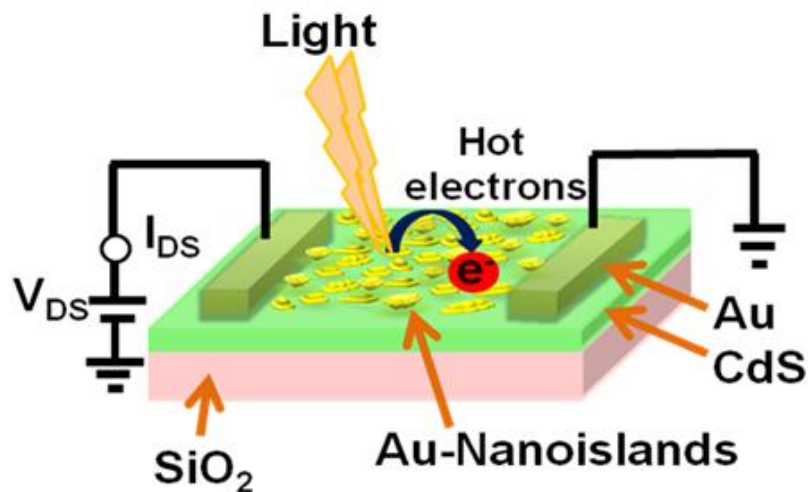

Fig.S3 Schematic diagram of the Au-CdS film based devices used for the experiments during research work. The channel of the device consist Au-nanoislands on top of CdS thin film. A laser light (halogen source act as Visible light Source, power density  $P_d = 22\text{mW}/\text{cm}^2$ , continuous wave laser-1064nm as near infrared light source with tunable power meter ( $P_d$  from  $0.04\text{mW}/\text{cm}^2$  to  $29\text{mW}/\text{cm}^2$ ) assisted with Al coated fiber incident on the surface of Au-CdS film. This schematic of the device geometry helps to explain the generation of hot electron at the surface of metal nanoislands due to enhanced absorption of light with localized surface plasmon resonance. The black curved arrow in schematic indicates the transfer of generated (highly energetic) hot electron from Au (metal) nanoislands to CdS thin film (semiconductor).

4. Bias voltage dependent photocurrent measurement and stability of device under 400nm illumination and white light respectively.

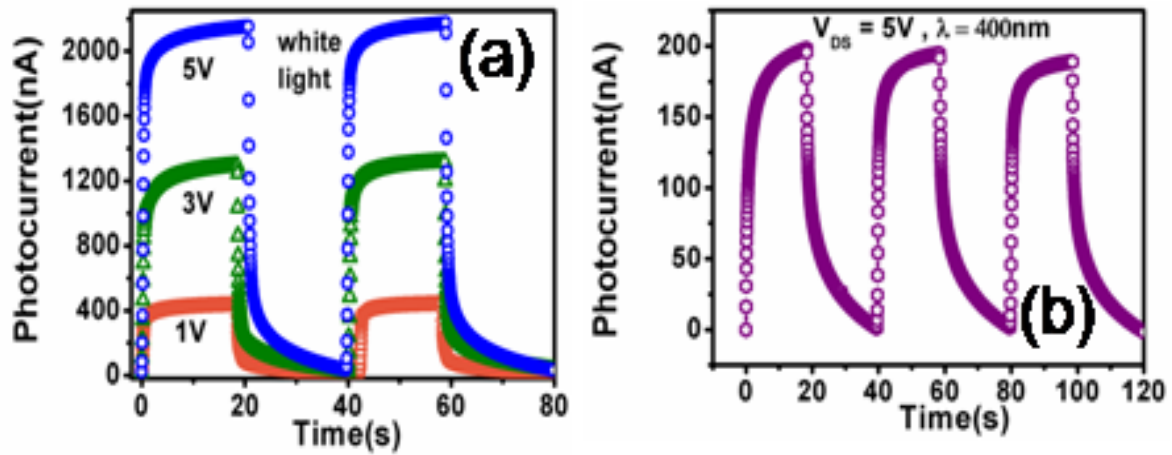

Fig.S4 (a) Bias voltage dependent photocurrent of Au-CdS film with halogen light as white light source (b) stability of the Au-CdS film at 5V under 400nm light illumination.

5. Power dependent photocurrent measurement and bias voltage dependent rise time measurement under NIR 1064nm illumination (power density;  $P_d = 29\text{mW/cm}^2$ ).

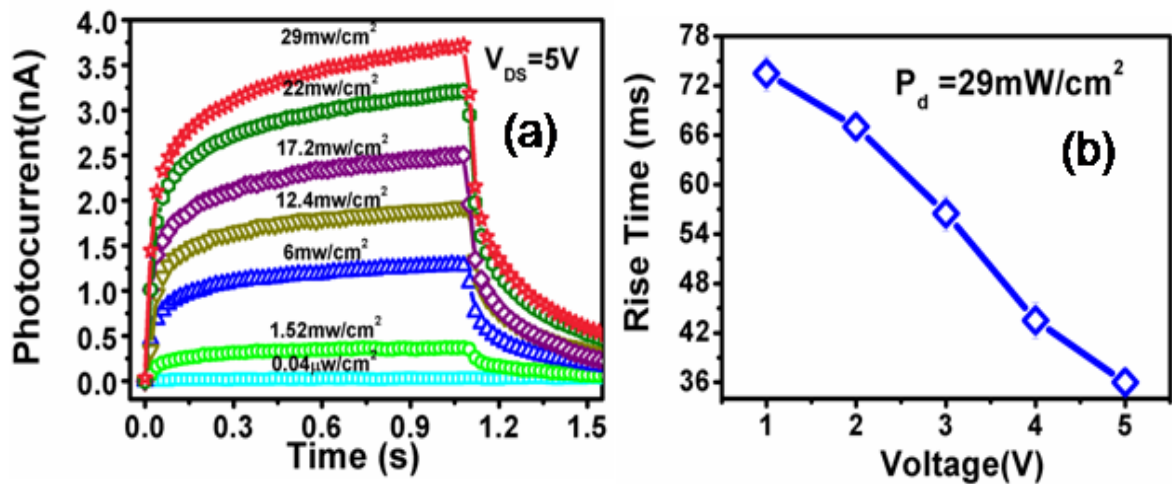

Fig.S5 (a) Transient photocurrent measurement Au-CdS film at different power densities ranges from ( $0.04\text{mW/cm}^2$  to  $29\text{mW/cm}^2$ ). This figure shows Au-CdS film is sensitive for lower power densities  $P_d$ . The photocurrent amplitude  $\sim 20\text{pA}$  for  $0.04\text{mW/cm}^2$  increases to  $3.7\text{nA}$  for  $29\text{mW/cm}^2$ . This significant increase in photocurrent is may be due to enhancement in field at the near the surface of nanoislands. (b) Response time Vs voltage characteristics of epitaxial grown Au-CdS at fixed NIR ( $1064\text{nm}$ )  $P_d = 29\text{mW/cm}^2$ . The rise time (defined as time of photocurrent to reach from 10% to maximum value 90%) dependence at different bias voltage of epitaxial grown Au-CdS. Rise time decreases with increase in voltage at fixed NIR ( $1064\text{nm}$ )  $P_d = 29\text{mW/cm}^2$ . At 1V rise time was 73ms which decreases up to 39ms at 5V.

## 6. Step wise rise of current & photocurrent dependence on power density.

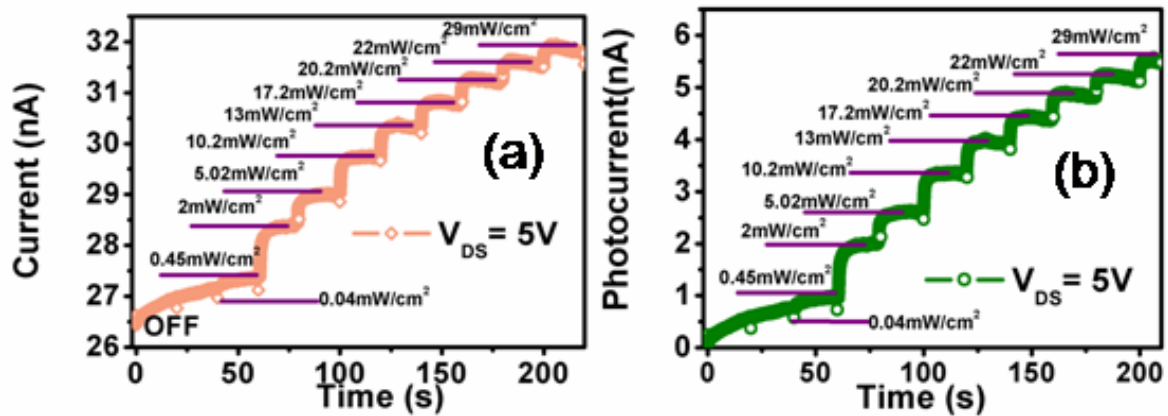

Fig. S6 (a) Step wise dependence of current on power w.r.t time at 5V bias voltage. (b) Step photocurrent dependent on power density w.r.t to time at 5V bias voltage of Au-CdS.

## 7. Description of topographic (2D) NSOM imaging.

The plasmonic enhancement in the visible range, of gold nanoislands having height up to several hundred nanometers has been investigated using, integrated near-field scanning optical microscope (Nanonics MultiView 2000) – atomic force microscope- Raman system has been used.

### NSOM

NSOM has a cantilevered aperture probe (~100 nm in diameter) pulled from single-mode fiber with gold coating, operating in illumination mode with laser source at 532 nm. The near-field experiments were performed using reflection modewith illumination through a fiber aperture probe produced by Nanonics. The NSOM tip is positioned above the sample. When the probe is close to the illuminated surface of the sample, it scatters the evanescent waves of the near field. The resulting radiated waves are reflected and detected in reflection mode by a photomultiplier tube (PMT) through a microscope objective (x50, N.A. 0.45). An image is formed by raster scanning the sample (20 μm X 20 μm) and recording the collected light intensity as a function of the scan position

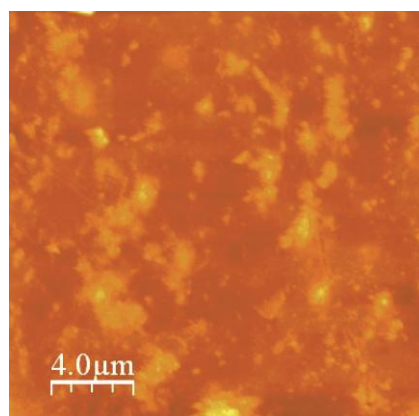

## 8. FDTD simulation results of Au-CdS film.

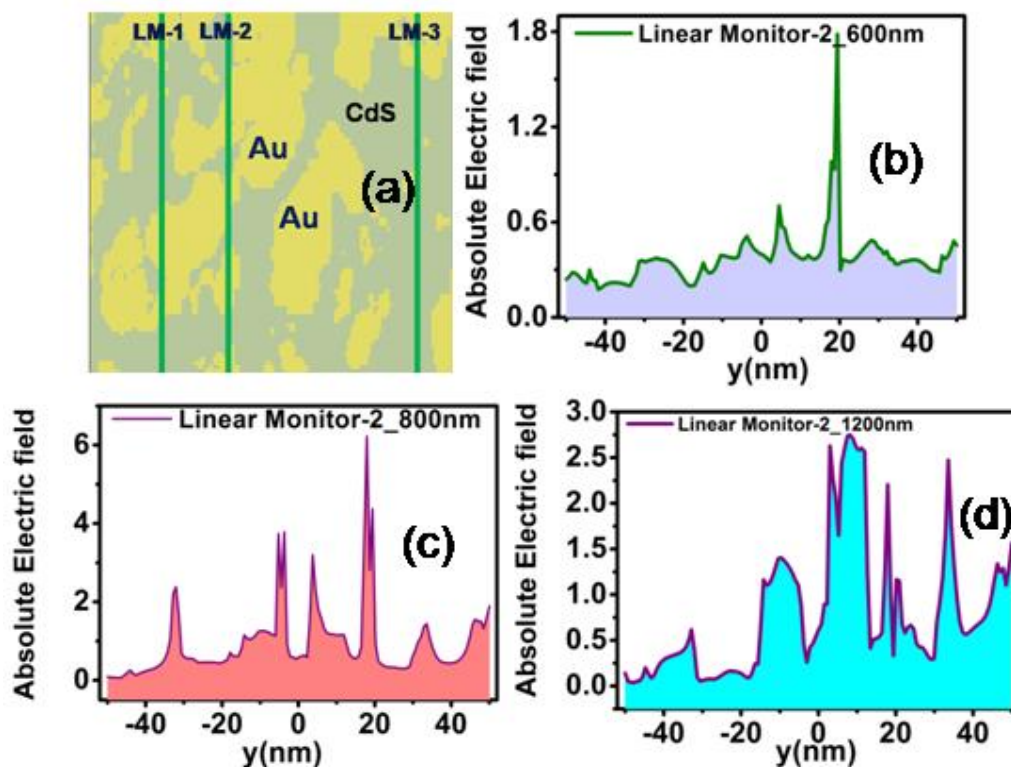

**Fig.S8** (a) 2D false image (top view) of Au- CdS film used during simulation. To show the electric field enhancement at Au-CdS interface along y-z plane, we cropped the image and use three linear monitors (LM-1, LM-2, and LM-3). (b) Electric field enhancement of Au-CdS at 600,800,1200nm. The electric field intensity enhancement was calculated using formula;  $\text{enhancement (\%)} = 100 * (E - E_0) / E_0$ , Where E = Electric field intensity of Au nanoislands grown on CdS film and  $E_0$  = Electric field intensity of only CdS film. The strong enhancement in electric field is observed between two close located Au-nanoislands.

### 9. Simulated absorption spectra of Au-CdS and experimental result of transmission spectra of Au-CdS.

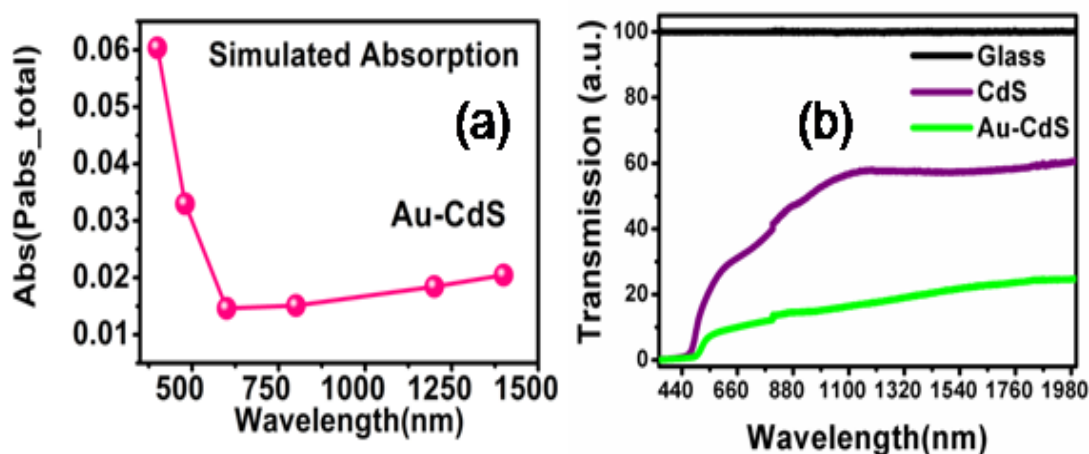

**Fig.S9** (a) simulated absorption spectra of Au-CdS film. It can observe absorption increases at higher wavelength. (b) Experimental comparison of transmission spectra of only glass, CdS film on glass and Au nanoislands decorated CdS Film. It indicates that 100% transmission in case of glass where as transmission decreases for CdS and very small transmission of light for Au-CdS.

### 10. Expanded spectra of CdS and Au-CdS pumped at 480nm.

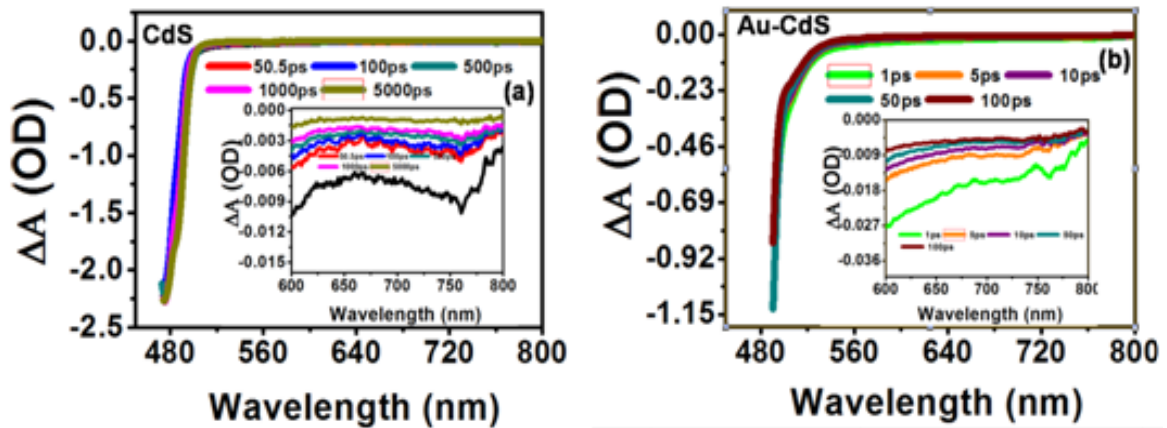

**Fig.S10** depicts the absorption spectra for only CdS film probed from 450nm to 800nm for 10ps to 5000ps; Inset indicates the zoomed view of absorption spectra from 600nm to 800nm. It clearly shows that with increase in delay time period, absorption reaches close to zero. (b) indicates the absorption spectra of Au nanoislands grown on CdS film from 450nm to 800nm for 1ps to 100ps; Inset shows enlarged view of absorption spectra for respective time period. It clearly shows that absorption decreases with increase in delay time period

**11. Transient absorption spectrum of only gold nanoislands at 1250nm pumping.**

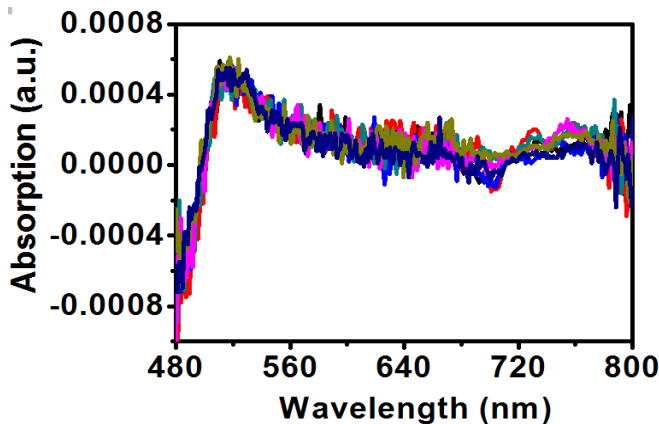

**Fig. S11** Transient absorption of only gold film pumped at 1250nm. We observed the expected absorption signal of gold at 540nm which is consistent with the published articles.

**12. Comparison between CdS and Au-CdS in transient absorption and transient kinetic spectrum.**

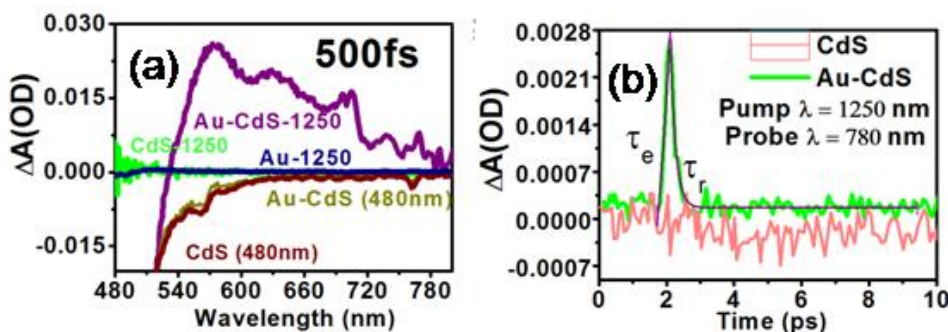

**13. Table 1: Transient kinetic analysis of CdS film pumped at 1250nm.**

| S.NO | $\lambda$<br>nm | IRF<br>(ps)    | $\tau_0$<br>(ps)  | $\tau_1$<br>(ps) | A <sub>1</sub>   | $\tau_2$<br>(ps) | A <sub>2</sub>          | $\tau_3$<br>(ps)       | A <sub>3</sub>                 |
|------|-----------------|----------------|-------------------|------------------|------------------|------------------|-------------------------|------------------------|--------------------------------|
| 1.   | 486             | 0.218<br>±1.29 | 0.2784<br>±0.103  | 0.109<br>±0.11   | -0.185<br>±1.100 | 271.9<br>±3100   | -0.0035<br>±0.21        | 401.8<br>±205          | -0.0012<br>±0.0088             |
| 2.   | 508             | 0.237<br>±0.07 | 0.2883<br>±0.0414 | 0.199<br>±0.77   | 0.0253<br>±0.02  | 250.9±<br>148    | -0.0139<br>±0.009       | 1534<br>±11700         | -<br>0.00031<br>±0.0009        |
| 3.   | 550             | 0.208<br>±2.91 | 0.2936<br>±0.0238 | 0.1043<br>±0.021 | 0.109±<br>15000  | 121<br>±364      | -<br>0.00023<br>±0.003  | 1534<br>±17200         | 0.00008<br>±0.0003             |
| 4.   | 600             | 0.191<br>±2.74 | 0.2763<br>±0.0091 | 0.0958±<br>0.001 | 0.0852<br>±12000 | 112.5<br>±387    | -<br>0.00013<br>±0.0023 | 1533<br>±1700          | -<br>0.00005<br>±0.0019        |
| 5.   | 650             | 0.179<br>±3.41 | 0.2690<br>±0.0150 | 0.0897<br>±0.010 | 0.0458<br>±87000 | 81.32<br>±121    | -<br>0.00043<br>±0.0003 | 9739<br>±243           | -<br>0.00005<br>17±0.00<br>048 |
|      |                 |                |                   |                  |                  |                  |                         |                        |                                |
| 6.   | 700             | 0.165<br>±2.01 | 0.2098<br>±0.0012 | 0.1209±<br>0.005 | 0.0104<br>±6     | 24.04<br>±0.05   | -<br>0.00000<br>984±1   | 288900<br>00±0.01      | -515±1                         |
| 7.   | 720             | 0.013<br>±1.09 | 0.1633±<br>0.09   | 0.1335±<br>0.001 | 0.0040<br>±5     | 24.74<br>±0.01   | -<br>0.00245<br>±1      | 288900<br>00±0.00<br>2 | -358±1                         |
| 8.   | 750             | 0.085<br>±0.09 | 0.205<br>±0.100   | 0.0857<br>±0.05  | 0.00924<br>±1    | 150.08<br>±0.001 | -<br>0.00010<br>4±1     | 288900<br>00±0.00<br>4 | -255±1                         |
| 9.   | 800             | 0.162<br>±0.05 | 0.04186<br>±0.025 | 0.0813±<br>0.001 | 0.00677<br>±1    | 235.2<br>±0.002  | -<br>0.00006<br>79±1    | 288900<br>00±0.00<br>6 | -380±2                         |



**Table 2: Transient kinetic analysis of Au-CdS pumped at 1250nm.**

| S.NO. | $\lambda$<br>nm | IRF<br>(ps)         | $\tau_0$<br>(ps)      | $\tau_1$<br>(ps)        | $A_1$                 | $\tau_2$<br>(ps)    | $A_2$                          | $\tau_3$<br>(ps)      | $A_3$                           |
|-------|-----------------|---------------------|-----------------------|-------------------------|-----------------------|---------------------|--------------------------------|-----------------------|---------------------------------|
| 1.    | 486             | 0.205<br>$\pm 0.1$  | 0.1285<br>$\pm 0.121$ | 0.7108<br>$\pm 0.065$   | -0.164<br>$\pm 0.440$ | 243.4<br>$\pm 99.1$ | -0.0014<br>$\pm 0.0013$        | 3720<br>$\pm 5690$    | -0.0056<br>$\pm 0.0012$         |
| 2.    | 508             | 0.237<br>$\pm 0.06$ | 0.1677<br>$\pm 0.066$ | 0.7902<br>$\pm 0.037$   | 0.0599<br>$\pm 0.058$ | 224.3<br>$\pm 37.5$ | -0.000506<br>$\pm 0.00017$     | 29220<br>$\pm 82800$  | -0.0018<br>$\pm 0.0009$         |
| 3.    | 532             | 0.226<br>$\pm 1.61$ | 0.1133<br>$\pm 0.031$ | 0.8205<br>$\pm 0.0309$  | 0.168<br>$\pm 1200$   | 225<br>$\pm 59$     | -0.00004<br>$\pm 0.00096$      | 29220<br>$\pm 60500$  | -0.000094<br>$\pm 0.0003$       |
| 4.    | 600             | 0.167<br>$\pm 1.51$ | 0.0837<br>$\pm 0.013$ | 0.0.8928<br>$\pm 0.124$ | 0.138<br>$\pm 1300$   | 226<br>$\pm 129$    | -<br>0.00018<br>$\pm 0.000045$ | 29220<br>$\pm 965000$ | -<br>0.0000203<br>$\pm 0.00027$ |
| 5.    | 650             | 0.176<br>$\pm 2.17$ | 0.0800<br>$\pm 0.020$ | 0.9215<br>$\pm 0.02015$ | 0.0624<br>$\pm 7700$  | 227.9<br>$\pm 118$  | -<br>0.000445<br>$\pm 0.00002$ | 29220<br>$\pm 145000$ | -<br>0.0000127<br>$\pm 0.00048$ |
| 6.    | 700             | 0.139<br>$\pm 1.41$ | 0.0609<br>$\pm 0.020$ | 0.9509<br>$\pm 0.0366$  | 0.0409<br>$\pm 4100$  | 191.2<br>$\pm 137$  | -0.0004<br>$\pm 0.00027$       | 29130<br>$\pm 16500$  | -0.000173<br>$\pm 0.0043$       |
| 7.    | 750             | 0.013<br>$\pm 0.09$ | 0.0066<br>$\pm 26.5$  | 0.9789<br>$\pm 39.15$   | 7.37<br>$\pm 6300$    | 172.4<br>$\pm 187$  | -<br>0.0000263<br>$\pm 0.0009$ | 32200<br>$\pm 872000$ | -0.000186<br>$\pm 0.0093$       |
| 8.    | 800             | 0.013<br>$\pm 0.05$ | 0.0060<br>$\pm 18.3$  | 0.9818<br>$\pm 23.1$    | 2.35<br>$\pm 530000$  | 141.4<br>$\pm 76.2$ | -<br>0.000157<br>$\pm 0.00002$ | 32200<br>$\pm 46300$  | -0.000125<br>$\pm 0.000034$     |

**Table 3: Comparison between recovery dynamics of CdS and Au-CdS pumped at 1250nm.**

| <b>Probe Wavelength</b> | <b>CdS<br/>Decay time</b> | <b>Au-CdS<br/>Decay time</b> |
|-------------------------|---------------------------|------------------------------|
| 535nm                   | 980fs                     | 180fs                        |
| 600nm                   | 184fs                     | 90fs                         |
| 650nm                   | 160fs                     | 103fs                        |

**Table 4: Reported mechanism for metal and semiconductor.**

| S.No | System                         | Pump Wavelength                                 | Probe wavelength | Formation Time/<br>Excitation Time           | Decay Time/<br>Recovery Time                 | Relaxation Time                                | Mechanism                         | Ref             |
|------|--------------------------------|-------------------------------------------------|------------------|----------------------------------------------|----------------------------------------------|------------------------------------------------|-----------------------------------|-----------------|
| 1.   | Au-CdSe                        | 800nm                                           | 3000nm           | 20±10fs                                      | ~1.45±0.15 ps                                | ---                                            | PICTT                             | 1               |
| 2.   | Au-CdS Colloidal Nanocomposite | 400nm                                           | -----            | 300fs                                        | 11ps                                         | 100ps                                          | PCT                               | 2               |
| 3.   | CdS-Au Nanorods                | 400nm                                           | 3000nm           | 97fs                                         | 1.83±0.22 ps                                 | --                                             | PIHET                             | 3               |
| 4.   | Ag@Cu <sub>2</sub> O           | 600-750nm                                       | 800nm            | -----                                        | -----                                        |                                                | PIRET+DET                         | 4               |
| 5.   | Au-TiO <sub>2</sub>            | 550nm                                           | -----            | <240fs                                       | -----                                        | --                                             | PCT                               | 5               |
| 6.   | Au@Cu <sub>2</sub> O           | 650nm                                           | -----            | <100fs                                       | 2ps                                          | --                                             | DET+RET                           | 6               |
| 7.   | <b>Au-CdS</b>                  | <b>1140nm</b><br><b>1250nm</b><br><b>1440nm</b> | <b>550nm</b>     | <b>150fs</b><br><b>104fs</b><br><b>125fs</b> | <b>220ps</b><br><b>120ps</b><br><b>180ps</b> | <b>3.5ns</b><br><b>1.53ns</b><br><b>2.12ns</b> | <b>PICTT/</b><br><b>DET/PIHET</b> | <b>Our Work</b> |

1. K. Wu, J. Chen, J. R. McBride and T. Lian, *Science*, 2015, 349, 632.
2. E. Khon, A. Mereshchenko, A. N. Tarnovsky, K. Acharya, A. Klinkova, N. N. Hewa-Kasakarage, I. Nemitz and M. Zamkov, *Nano Letters*, 2011, 11, 1792-1799.
3. K. Wu, W. E. Rodríguez-Córdoba, Y. Yang and T. Lian, *Nano Letters*, 2013, 13, 5255-5263.
4. J. Li, S. K. Cushing, J. Bright, F. Meng, T. R. Senty, P. Zheng, A. D. Bristow and N. Wu, *ACS Catalysis*, 2013, 3, 47-51.
5. A. Furube, L. Du, K. Hara, R. Katoh and M. Tachiya, *Journal of the American Chemical Society*, 2007, 129, 14852-14853.
6. S. K. Cushing, J. Li, F. Meng, T. R. Senty, S. Suri, M. Zhi, M. Li, A. D. Bristow and N. Wu, *Journal of the American Chemical Society*, 2012, 134, 15033-15041.

**Table 5: Detail kinetic study at different pumping wavelength.**

| <b>S.No.</b> | <b>Pump Wavelength</b> | <b>Probe Wavelength</b> | <b><math>\tau_1</math><br/>excitation<br/>time (ps)</b> | <b><math>\tau_2</math><br/>recovery time<br/>(ps)</b> | <b><math>\tau_3</math><br/>relaxation time<br/>(ps)</b> |
|--------------|------------------------|-------------------------|---------------------------------------------------------|-------------------------------------------------------|---------------------------------------------------------|
| 1.           | 1140nm                 | 500nm                   | 0.2068±0.0712                                           | 3.946±1.6                                             | 328.6±26.2                                              |
|              |                        | 650nm                   | 0.1111±0.0243                                           | 5.596±0.254                                           | 486.9±43.2                                              |
|              |                        | 780nm                   | 0.3182±0.02582                                          | 4.493±0.292                                           | 485.2±81.8                                              |
| 2.           | 1250nm                 | 480nm                   | 0.109±0.11                                              | 273±3100                                              | 401.8±205                                               |
|              |                        | 650nm                   | 0.0897±0.001                                            | 81.32±121                                             | 9739±243                                                |
|              |                        | 780nm                   | 0.0857±0.05                                             | 150.08±0.001                                          | 28890000±0.0004                                         |
| 3.           | 1400nm                 | 480nm                   | 0.114±0.0392                                            | 361.8±71.4                                            | ±2690                                                   |
|              |                        | 650nm                   | 0.1115±0.0194                                           | 5.00±0.215                                            | 6853±1440                                               |
|              |                        | 780nm                   | 0.629±0.0245                                            | 2.67±0.324                                            | 6848±1630                                               |
